# Supplementary material for: Surface enhanced Raman scattering of Ag or Au nanoparticle-decorated reduced graphene oxide for detection of aromatic molecules
Source: Royal Society of Chemistry journal article supplement (doi:10.1039/c1sc00254f), 2011-01-01
Supplement: c1sc00254f.pdf [file c1sc00254f.pdf]

## [Electronic Supplementary Information]

# Surface Enhanced Raman Scattering of Ag or Au Nanoparticle-Decorated Reduced Graphene Oxide for Detection of Aromatic Molecules

*Gang Lu,<sup>1</sup> Hai Li,<sup>1</sup> Cipto Liusman,<sup>1</sup> Zongyou Yin,<sup>1</sup> Shixin Wu,<sup>1</sup> Hua Zhang<sup>\*1,2</sup>*

<sup>1</sup>School of Materials Science and Engineering, Nanyang Technological University, 50 Nanyang Avenue, Singapore 639798, Singapore

<sup>2</sup>Center for Biomimetic Sensor Science, Nanyang Technological University, 50 Nanyang Drive, Singapore 637553, Singapore

\*Corresponding author

Fax: (+65) 67909081

E-mail: [h Zhang@ntu.edu.sg](mailto:h Zhang@ntu.edu.sg); [h Zhang166@yahoo.com](mailto:h Zhang166@yahoo.com)

Website: <http://www.ntu.edu.sg/home/h Zhang>

## Supporting Figures

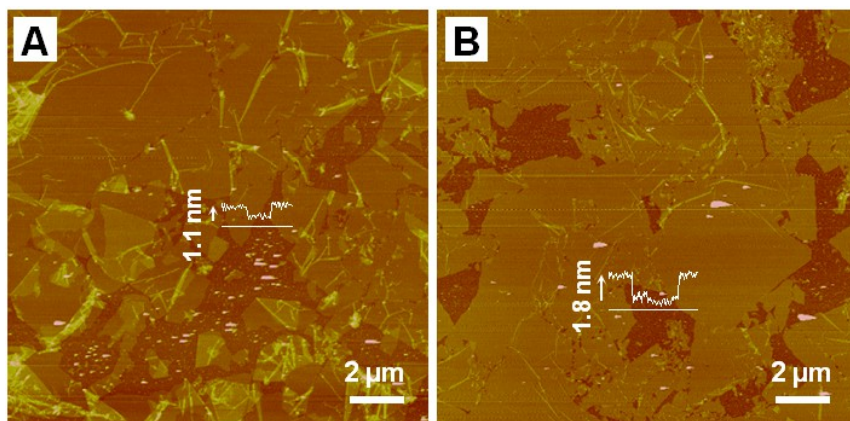

**Fig. S1** AFM images of rGO sheets on Si substrate before (A) and after (B) adsorption of R6G.
